# Supplementary material
Source: publisher site journal article supplement (https://www.dovepress.com/article/341774)
Supplement: Supplementary file 1 [file get_supplementary_file.php]

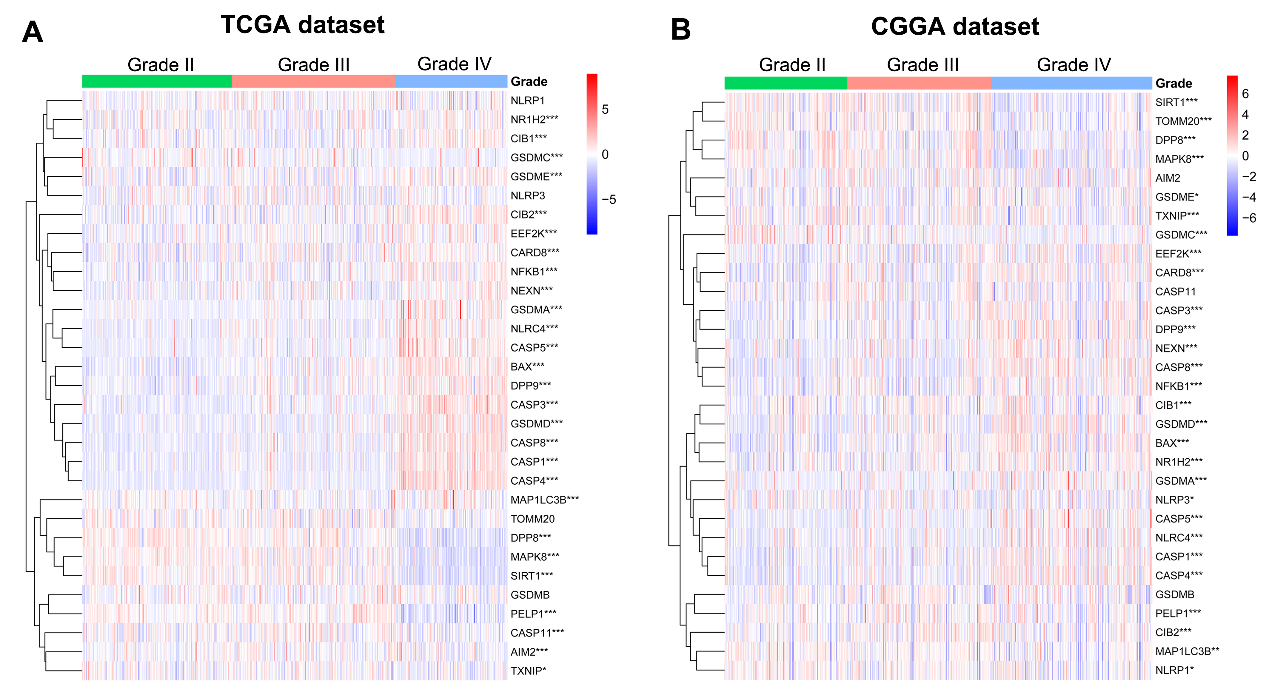


**Supplementary Figure S1. (A, B)** The expression comparison of 31 PRGs among different WHO grades in TCGA dataset (n=550) and CGGA dataset (n=936). * *p*<0.05, ** *p*<0.01, and *** *p*<0.001.


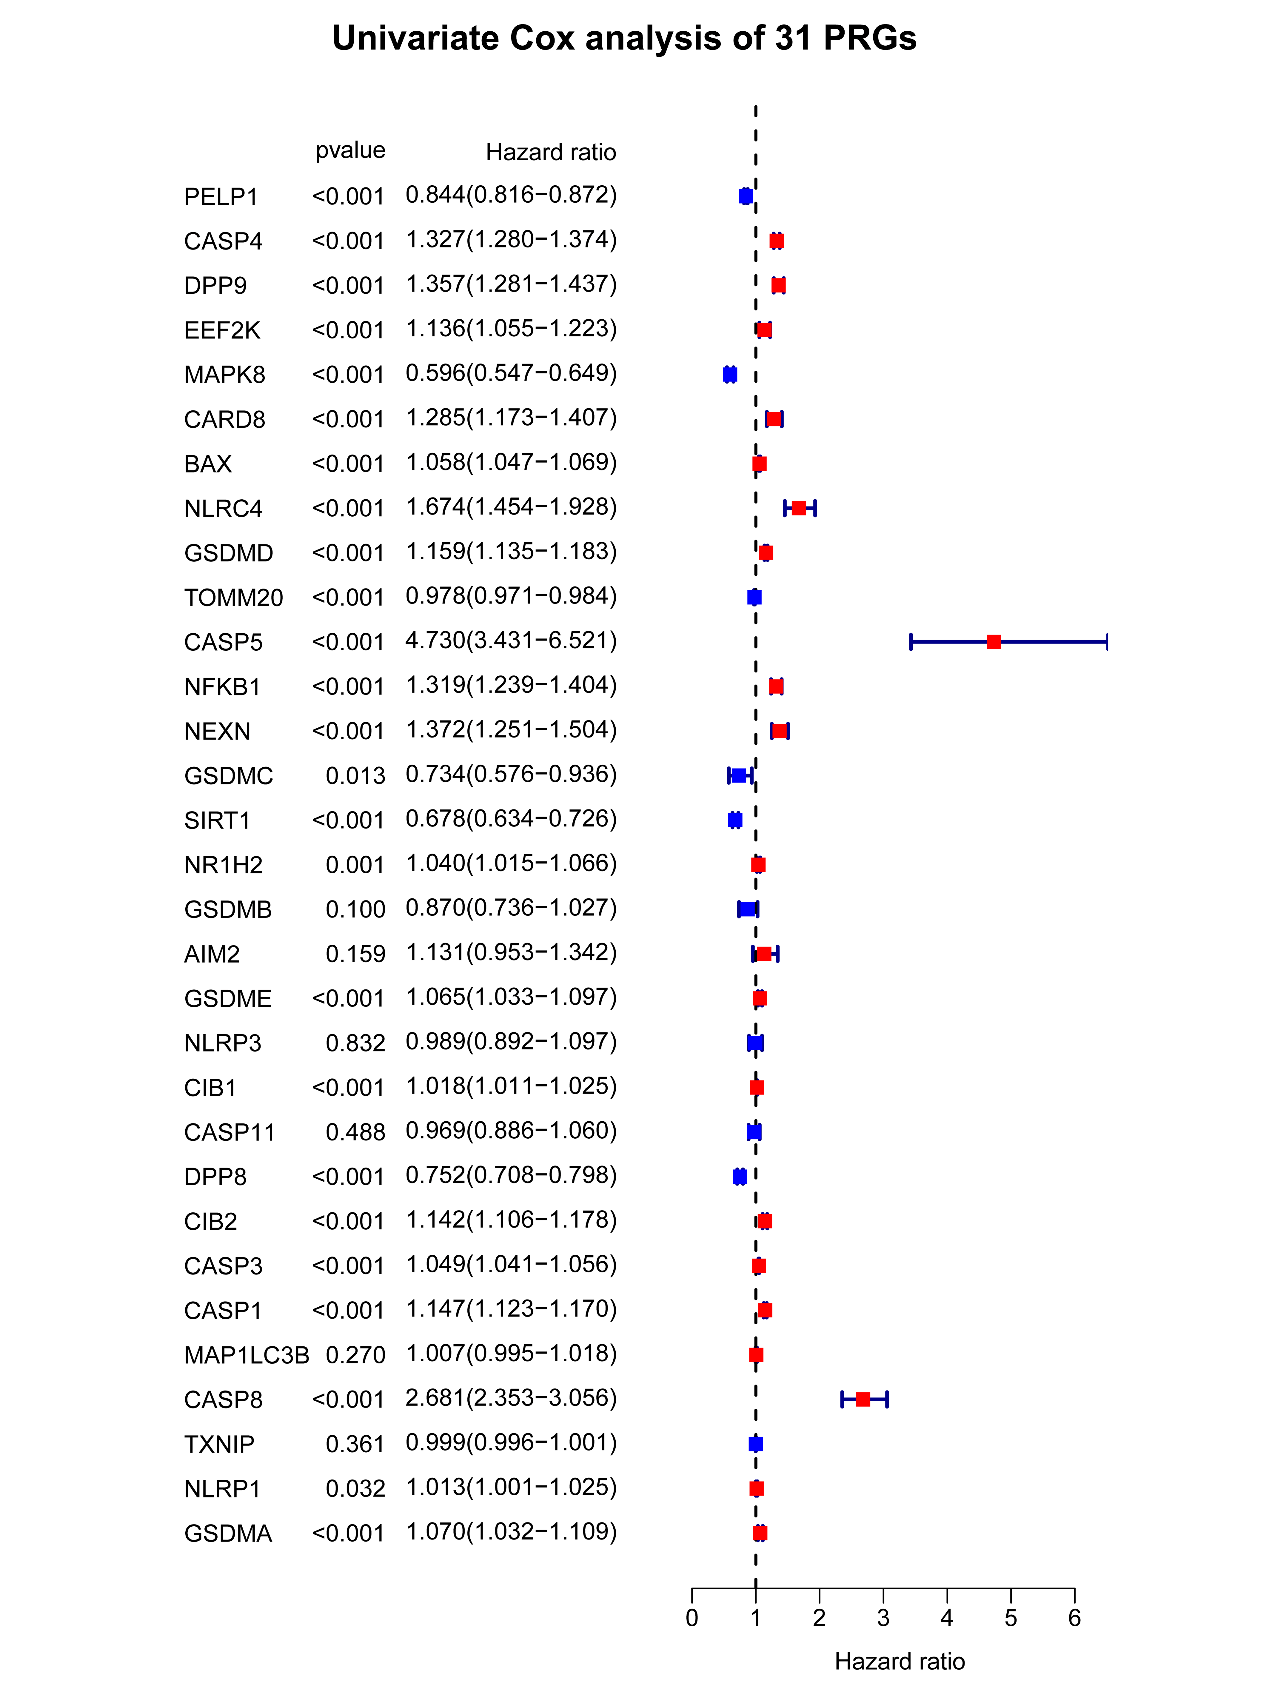


**Supplementary Figure S2.** Univariate Cox regression analysis of PRGs in TCGA cohort.


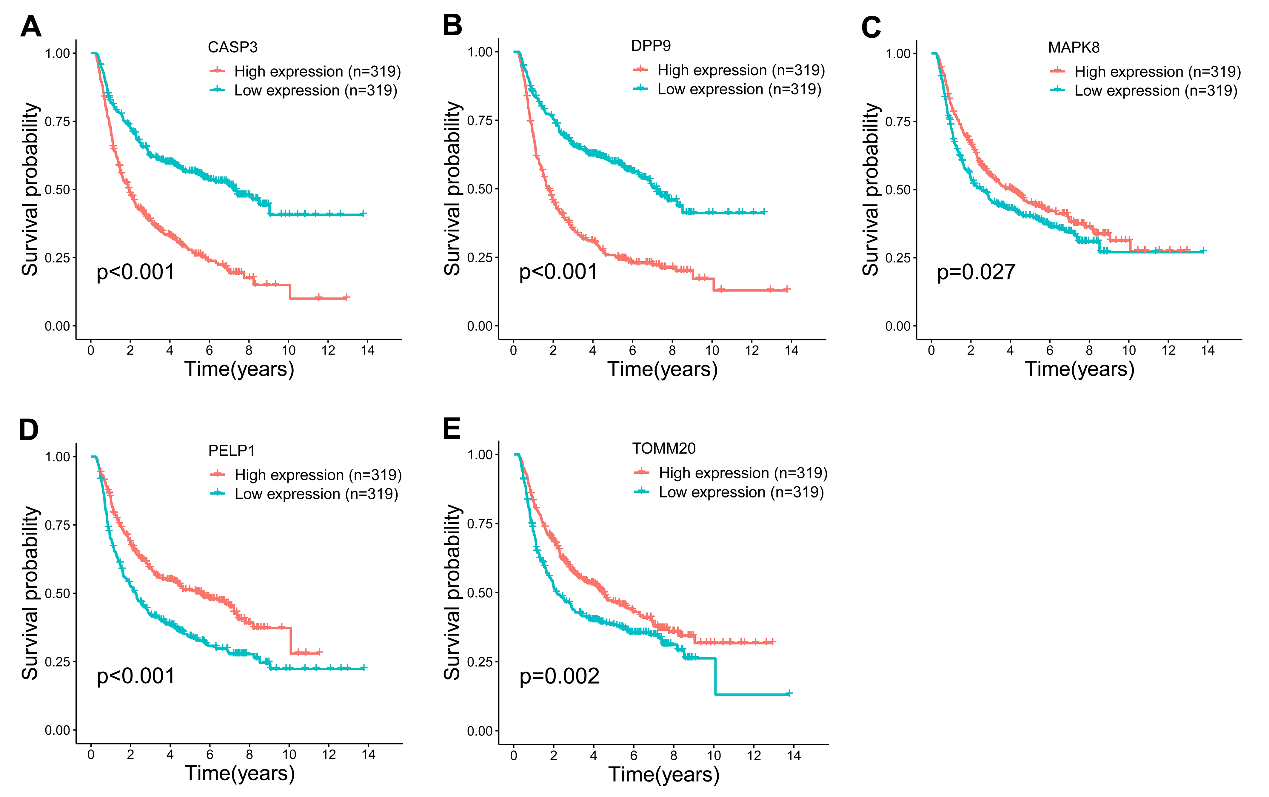


**Supplementary Figure S3. (A-E)** Kaplan–Meier curves of five selected PRGs in CGGA693 cohort.


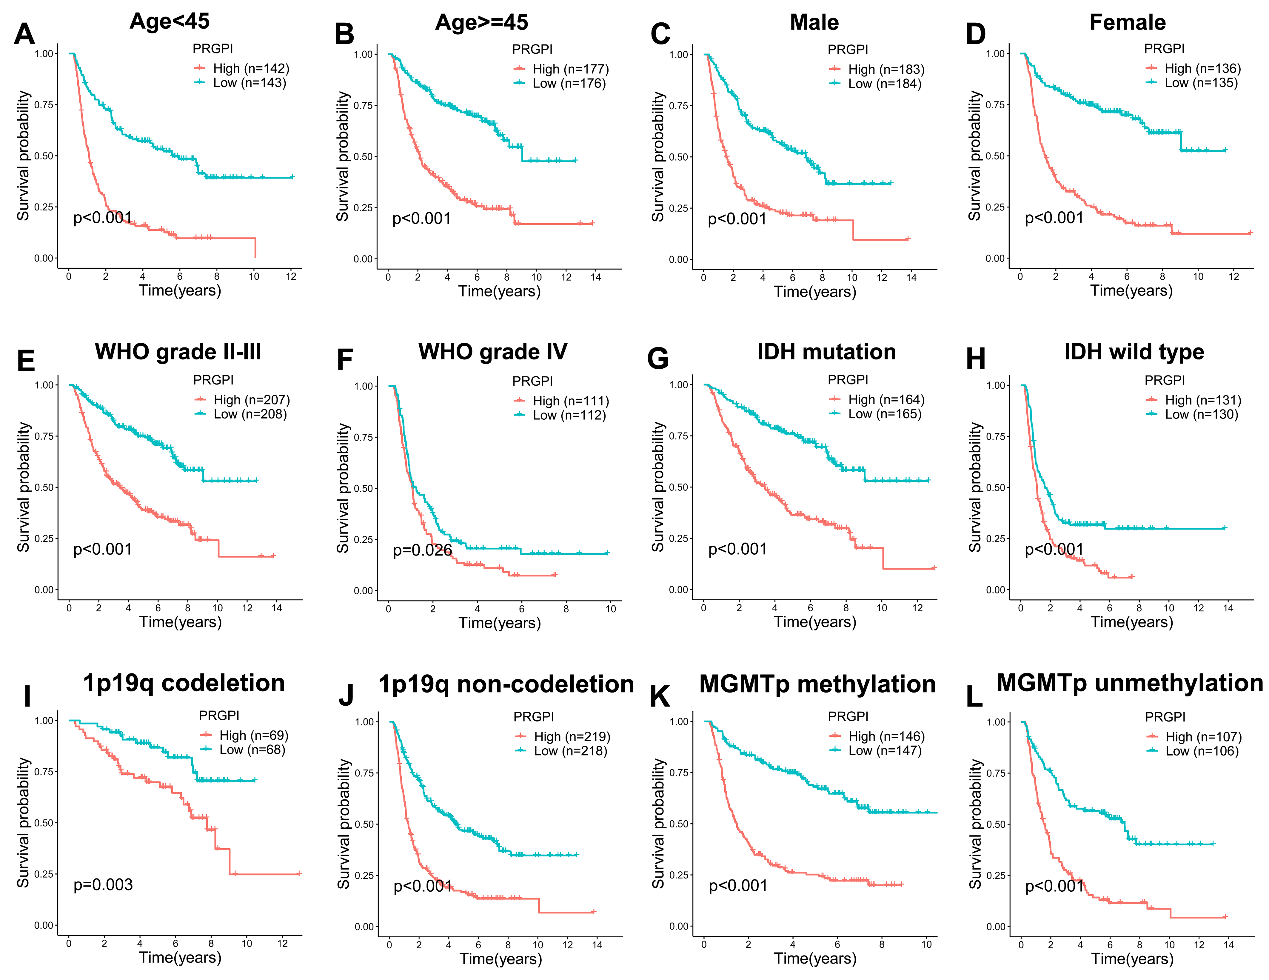


**Supplementary Figure S4. (A-L)** Kaplan-Meier curves of PRGPI in subgroups classified by various clinicopathological characteristics in CGGA693 cohort.


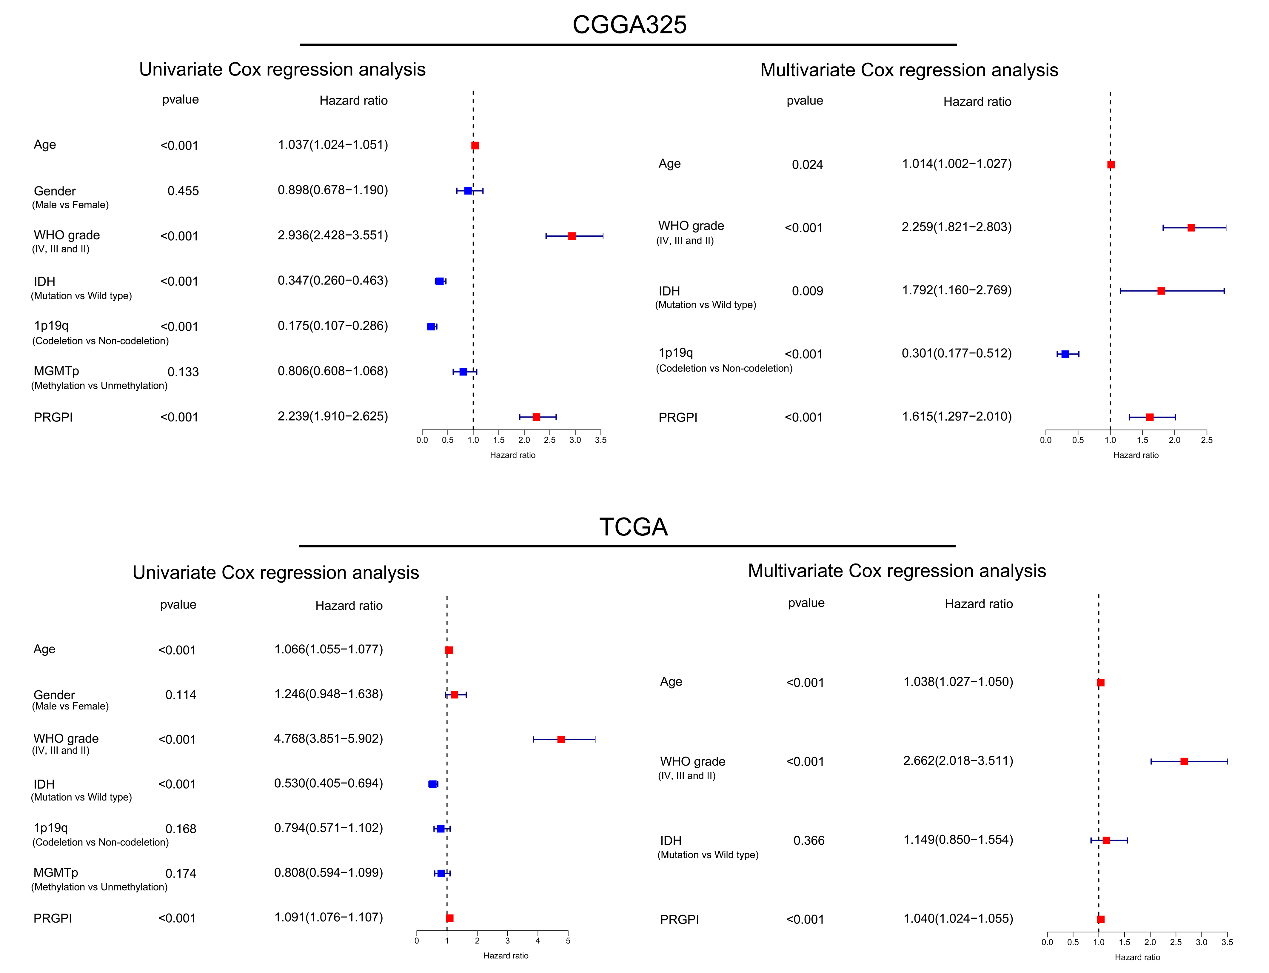


**Supplementary Figure S5.** Univariate and multivariate Cox regression analyses for identifying independent prognostic factors in CGGA325 and TCGA cohorts.


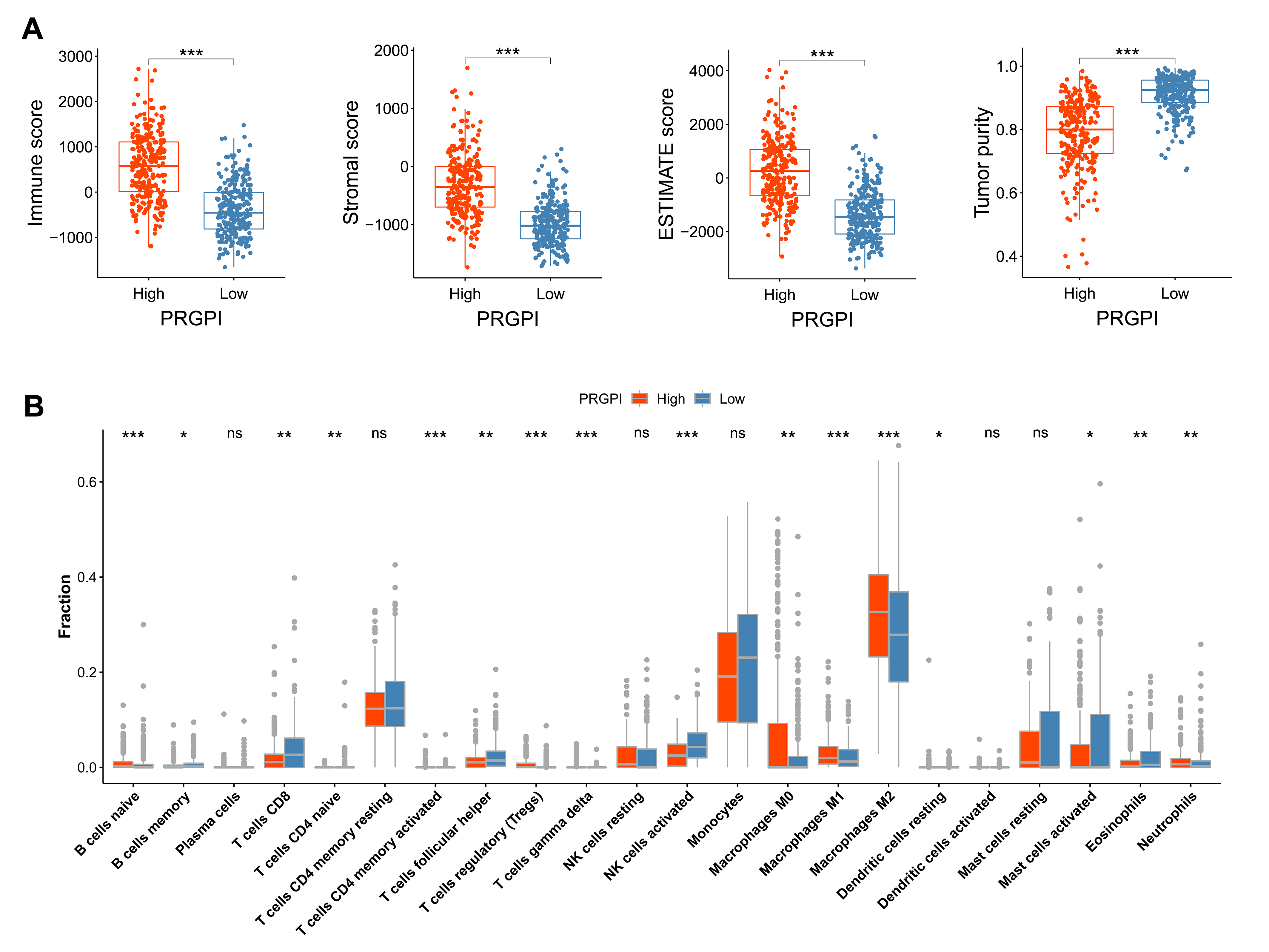


**Supplementary Figure S6.** The immune microenvironment of different PRGPI subgroups in TCGA cohort. **(A)** The comparison of immune score, stromal score, ESTIMATE score and tumor purity between PRGPI-high and PRGPI-low groups. **(B)** The infiltration of 22 immune cells in PRGPI-high and PRGPI-low groups. * *p*<0.05, ** *p*<0.01, *** *p*<0.001, and ns No significance.


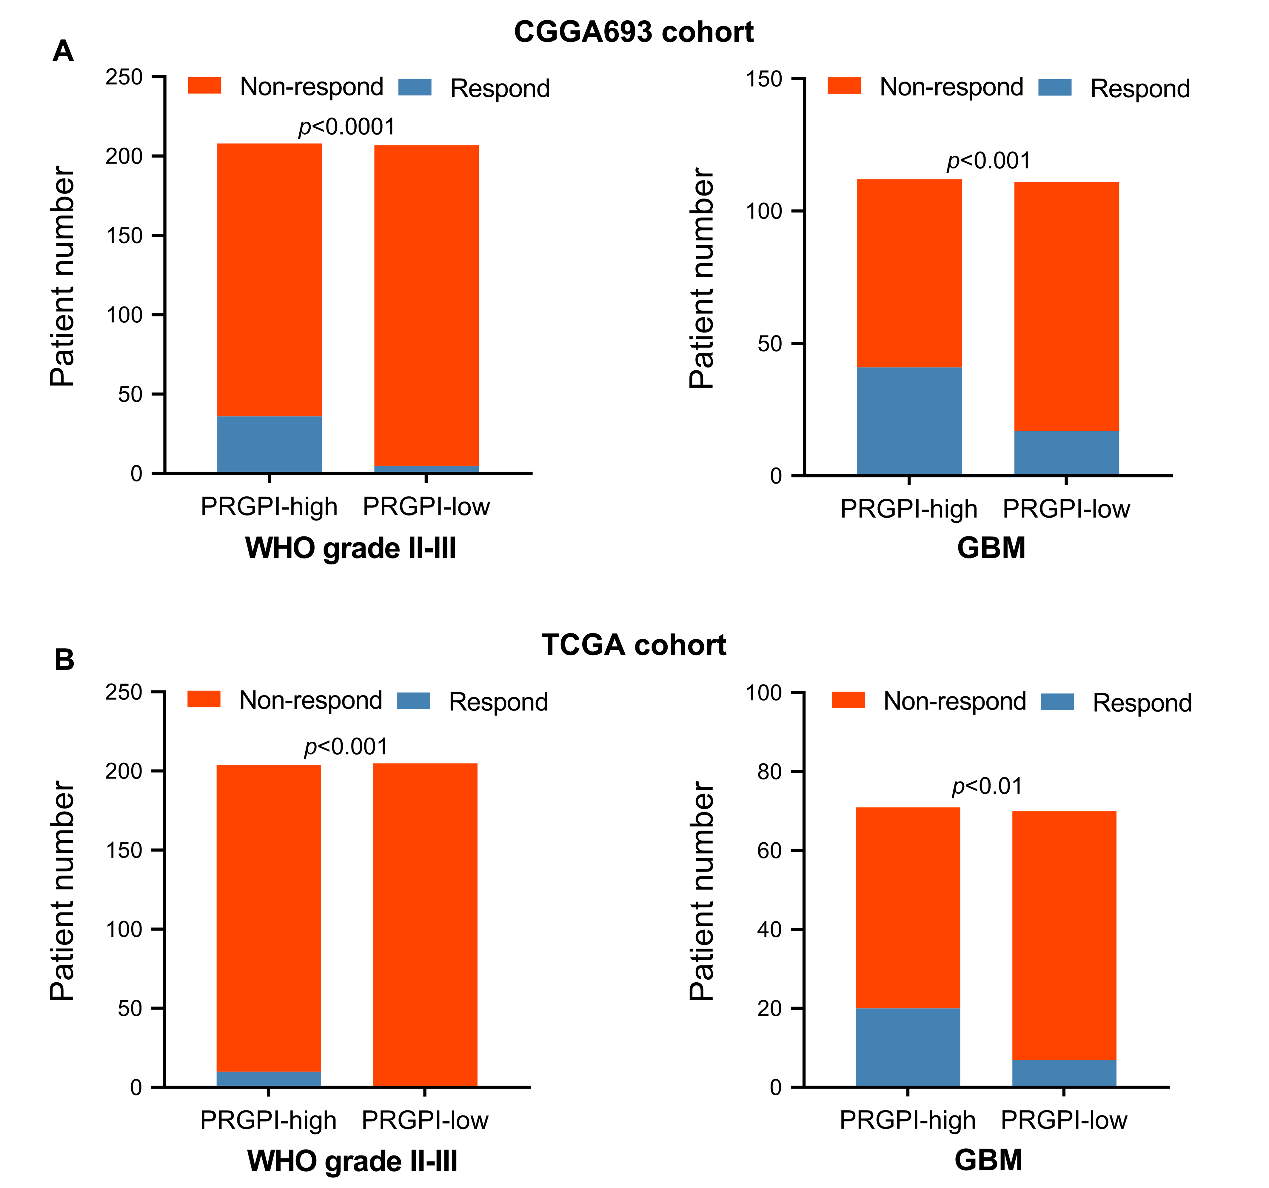


**Supplementary Figure S7. (A)** The distribution of ICI therapy responders between PRGPI subgroups in patients with WHO grade II-III (PRGPI-high group: 36/208 vs PRGPI-low group 5/207) and GBM (PRGPI-high group: 41/112 vs PRGPI-low group 17/111) in CGGA693 cohort. **(B)** The distribution of ICI therapy responders between PRGPI subgroups in patients with WHO grade II-III (PRGPI-high group: 10/204 vs PRGPI-low group 0/205) and GBM (PRGPI-high group: 20/71 vs PRGPI-low group 7/70) in TCGA cohort.

**Supplementary Table S1. Pyroptosis-related genes (PRGs)**

| **PRGs** | **Gene ID** | **Full name** | **Reference** | |
| --- | --- | --- | --- | --- |
| AIM2 | 9447 | absent in melanoma 2 | | (Ruan, Wang, and Wang 2020) | |
| BAX | 581 | BCL2 Associated X | | (Zhou et al. 2018) | |
| CARD8 | 22900 | caspase recruitment domain family member 8 | | (Johnson et al. 2018) | |
| CASP1 | 581 | caspase 1 | | (Cheng et al. 2019) | |
| CASP11 | 9169 | SR-related CTD associated factor 11 | | (Cheng et al. 2017) | |
| CASP3 | 836 | caspase 3 | | (Wang et al. 2017) | |
| CASP4 | 837 | caspase 4 | | (Ding et al. 2016) | |
| CASP5 | 838 | caspase 5 | | (Man, Karki, and Kanneganti 2017) | |
| CASP8 | 841 | caspase 8 | | (Sarhan et al. 2018) | |
| CIB1 | 10519 | calcium and integrin binding 1 | | (Wang et al. 2020) | |
| CIB2 | 10518 | calcium and integrin binding family member 2 | | (Wang et al. 2020) | |
| DPP8 | 54878 | dipeptidyl peptidase 8 | | (Johnson et al. 2018) | |
| DPP9 | 91039 | dipeptidyl peptidase 9 | | (Johnson et al. 2018) | |
| EEF2K | 29904 | eukaryotic elongation factor 2 kinase | | (Yu, Wang, et al. 2019) | |
| GSDMA | 284110 | gasdermin A | | (Zheng and Li 2020) | |
| GSDMB | 55876 | gasdermin B | | (Zheng and Li 2020) | |
| GSDMC | 56169 | gasdermin C | | (Zheng and Li 2020) | |
| GSDMD | 79792 | gasdermin D | | (Zheng and Li 2020) | |
| GSDME | 1687 | gasdermin E | | (Zheng and Li 2020) | |
| MAP1LC3B | 81631 | microtubule associated protein 1 light chain 3 beta | | (Kong et al. 2019) | |
| MAPK8 | 5599 | mitogen-activated protein kinase 8 | | (Yu, Li, et al. 2019) | |
| NEXN | 91624 | nexilin F-actin binding protein | | (Wu et al. 2020) | |
| NFKB1 | 4790 | nuclear factor kappa B subunit 1 | | (Chen et al. 2019) | |
| NLRC4 | 58484 | NLR family CARD domain containing 4 | | (Ruan, Wang, and Wang 2020) | |
| NLRP1 | 22861 | NLR family pyrin domain containing 1 | | (Ruan, Wang, and Wang 2020) | |
| NLRP3 | 114584 | NLR family pyrin domain containing 3 | | (Ruan, Wang, and Wang 2020) | |
| NR1H2 | 7376 | nuclear receptor subfamily 1 group H member 2 | | (Derangère et al. 2014) | |
| PELP1 | 27043 | proline, glutamate and leucine rich protein 1 | | (Wang et al. 2019) | |
| SIRT1 | 23411 | sirtuin 1 | | (So et al. 2018) | |
| TOMM20 | 9804 | translocase of outer mitochondrial membrane 20 | | (Zhou et al. 2018) | |
| TXNIP | 10628 | thioredoxin interacting protein | | (Zheng and Li 2020) | |

**References of Supplementary Table S1**

Chen, L., B. Weng, H. Li, H. Wang, Q. Li, X. Wei, H. Deng, S. Wang, C. Jiang, R. Lin, and J. Wu. 2019. "A thiopyran derivative with low murine toxicity with therapeutic potential on lung cancer acting through a NF-κB mediated apoptosis-to-pyroptosis switch." *Apoptosis* 24 (1-2):74-82. doi: 10.1007/s10495-018-1499-y.

Cheng, K. T., S. Xiong, Z. Ye, Z. Hong, A. Di, K. M. Tsang, X. Gao, S. An, M. Mittal, S. M. Vogel, E. A. Miao, J. Rehman, and A. B. Malik. 2017. "Caspase-11-mediated endothelial pyroptosis underlies endotoxemia-induced lung injury." *J Clin Invest* 127 (11):4124-4135. doi: 10.1172/jci94495.

Cheng, S. B., A. Nakashima, W. J. Huber, S. Davis, S. Banerjee, Z. Huang, S. Saito, Y. Sadovsky, and S. Sharma. 2019. "Pyroptosis is a critical inflammatory pathway in the placenta from early onset preeclampsia and in human trophoblasts exposed to hypoxia and endoplasmic reticulum stressors." *Cell Death Dis* 10 (12):927. doi: 10.1038/s41419-019-2162-4.

Derangère, V., A. Chevriaux, F. Courtaut, M. Bruchard, H. Berger, F. Chalmin, S. Z. Causse, E. Limagne, F. Végran, S. Ladoire, B. Simon, W. Boireau, A. Hichami, L. Apetoh, G. Mignot, F. Ghiringhelli, and C. Rébé. 2014. "Liver X receptor β activation induces pyroptosis of human and murine colon cancer cells." *Cell Death Differ* 21 (12):1914-24. doi: 10.1038/cdd.2014.117.

Ding, J., K. Wang, W. Liu, Y. She, Q. Sun, J. Shi, H. Sun, D. C. Wang, and F. Shao. 2016. "Pore-forming activity and structural autoinhibition of the gasdermin family." *Nature* 535 (7610):111-6. doi: 10.1038/nature18590.

Johnson, D. C., C. Y. Taabazuing, M. C. Okondo, A. J. Chui, S. D. Rao, F. C. Brown, C. Reed, E. Peguero, E. de Stanchina, A. Kentsis, and D. A. Bachovchin. 2018. "DPP8/DPP9 inhibitor-induced pyroptosis for treatment of acute myeloid leukemia." *Nat Med* 24 (8):1151-1156. doi: 10.1038/s41591-018-0082-y.

Kong, Y., Z. Feng, A. Chen, Q. Qi, M. Han, S. Wang, Y. Zhang, X. Zhang, N. Yang, J. Wang, B. Huang, Q. Zhang, G. Xiang, W. Li, D. Zhang, J. Wang, and X. Li. 2019. "The Natural Flavonoid Galangin Elicits Apoptosis, Pyroptosis, and Autophagy in Glioblastoma." *Front Oncol* 9:942. doi: 10.3389/fonc.2019.00942.

Man, S. M., R. Karki, and T. D. Kanneganti. 2017. "Molecular mechanisms and functions of pyroptosis, inflammatory caspases and inflammasomes in infectious diseases." *Immunol Rev* 277 (1):61-75. doi: 10.1111/imr.12534.

Ruan, J., S. Wang, and J. Wang. 2020. "Mechanism and regulation of pyroptosis-mediated in cancer cell death." *Chem Biol Interact* 323:109052. doi: 10.1016/j.cbi.2020.109052.

Sarhan, J., B. C. Liu, H. I. Muendlein, P. Li, R. Nilson, A. Y. Tang, A. Rongvaux, S. C. Bunnell, F. Shao, D. R. Green, and A. Poltorak. 2018. "Caspase-8 induces cleavage of gasdermin D to elicit pyroptosis during Yersinia infection." *Proc Natl Acad Sci U S A* 115 (46):E10888-e10897. doi: 10.1073/pnas.1809548115.

So, D., H. W. Shin, J. Kim, M. Lee, J. Myeong, Y. S. Chun, and J. W. Park. 2018. "Cervical cancer is addicted to SIRT1 disarming the AIM2 antiviral defense." *Oncogene* 37 (38):5191-5204. doi: 10.1038/s41388-018-0339-4.

Wang, L., K. Li, X. Lin, Z. Yao, S. Wang, X. Xiong, Z. Ning, J. Wang, X. Xu, Y. Jiang, D. Liu, Y. Chen, D. Zhang, and H. Zhang. 2019. "Metformin induces human esophageal carcinoma cell pyroptosis by targeting the miR-497/PELP1 axis." *Cancer Lett* 450:22-31. doi: 10.1016/j.canlet.2019.02.014.

Wang, X., Y. Yang, W. Q. Cai, and Y. Lu. 2020. "The Relationship of Sphingosine Kinase 1 With Pyroptosis Provides a New Strategy for Tumor Therapy." *Front Immunol* 11:574990. doi: 10.3389/fimmu.2020.574990.

Wang, Y., W. Gao, X. Shi, J. Ding, W. Liu, H. He, K. Wang, and F. Shao. 2017. "Chemotherapy drugs induce pyroptosis through caspase-3 cleavage of a gasdermin." *Nature* 547 (7661):99-103. doi: 10.1038/nature22393.

Wu, L. M., S. G. Wu, F. Chen, Q. Wu, C. M. Wu, C. M. Kang, X. He, R. Y. Zhang, Z. F. Lu, X. H. Li, Y. J. Xu, L. M. Li, L. Ding, H. L. Bai, X. H. Liu, Y. W. Hu, and L. Zheng. 2020. "Atorvastatin inhibits pyroptosis through the lncRNA NEXN-AS1/NEXN pathway in human vascular endothelial cells." *Atherosclerosis* 293:26-34. doi: 10.1016/j.atherosclerosis.2019.11.033.

Yu, J., S. Li, J. Qi, Z. Chen, Y. Wu, J. Guo, K. Wang, X. Sun, and J. Zheng. 2019. "Cleavage of GSDME by caspase-3 determines lobaplatin-induced pyroptosis in colon cancer cells." *Cell Death Dis* 10 (3):193. doi: 10.1038/s41419-019-1441-4.

Yu, P., H. Y. Wang, M. Tian, A. X. Li, X. S. Chen, X. L. Wang, Y. Zhang, and Y. Cheng. 2019. "Eukaryotic elongation factor-2 kinase regulates the cross-talk between autophagy and pyroptosis in doxorubicin-treated human melanoma cells in vitro." *Acta Pharmacol Sin* 40 (9):1237-1244. doi: 10.1038/s41401-019-0222-z.

Zheng, Z., and G. Li. 2020. "Mechanisms and Therapeutic Regulation of Pyroptosis in Inflammatory Diseases and Cancer." *Int J Mol Sci* 21 (4). doi: 10.3390/ijms21041456.

Zhou, B., J. Y. Zhang, X. S. Liu, H. Z. Chen, Y. L. Ai, K. Cheng, R. Y. Sun, D. Zhou, J. Han, and Q. Wu. 2018. "Tom20 senses iron-activated ROS signaling to promote melanoma cell pyroptosis." *Cell Res* 28 (12):1171-1185. doi: 10.1038/s41422-018-0090-y.

**Supplementary Table S2. The primers sequence used in this study**

| **Name** | **Forward-primer** | **Reverse-primer** |
| --- | --- | --- |
| CASP3 | 5’-CAGAGGGGATCGTTGTAGAAG-3’ | 5’-CCACTGTCTGTCTCAATGCC-3’ |
| DPP9 | 5’-CCAGGAATGTCCAGCCGTAT-3’ | 5’-GGGGAAGGGATAGAAGATGTC-3’ |
| MAPK8 | 5’-GTGGATTTATGGTCTGTGGGG-3’ | 5’-GGACATGGTGTTCCAAGCTGT-3’ |
| PELP1 | 5’-CAGACCAGCCTTTGTCCACT-3’ | 5’-CCACGCTGTCATCAGAGTCA-3’ |
| TOMM20 | 5’-TGTGGCAGCCCACTCTATTG-3’ | 5’-TGGTGGACTTGAGTGGAAGC-3’ |
| GAPDH | 5’-AAAAGCATCACCCGGAGGAGAA-3’ | 5’-AAGGAAATGAATGGGCAGCCG-3’ |

**Supplementary Table S3. The primary antibodies used in immunohistochemistry (IHC)**

| **Protein** | **Antibody Name** | **Antibody Number** | **Company** | **Antibody Concentration** |
| --- | --- | --- | --- | --- |
| CASP3 (Caspase-3) | Caspase-3 Rabbit pAb | A0214 | Abclonal Technology | 1:400 |
| DPP9 | DPP9 Rabbit pAb | A15548 | Abclonal Technology | 1:400 |
| MAPK8 (JNK1) | JNK1 Rabbit pAb | A0288 | Abclonal Technology | 1:400 |
| PELP1 | PELP1 Rabbit pAb | A13414 | Abclonal Technology | 1:400 |
| TOMM20 | TOMM20 Rabbit mAb | A19403 | Abclonal Technology | 1:2000 |

**Supplementary Table S4. The clinicopathological characteristics of PRGPI subgroups in CGGA693 cohort**

| **Clinicopathological characteristics** | **PRGPI-high**  **(n = 319)** | **PRGPI-low**  **(n = 319)** | ***p-*value** |
| --- | --- | --- | --- |
| **Age** (Mean ± SD) | 44.74 ± 13.86 | 41.77 ± 10.50 | <0.001 |
| **Gender** |  |  | 0.298 |
| Male | 190 (59.6%) | 177 (55.5%) |  |
| Female | 129 (40.4%) | 142 (44.5%) |
| **WHO grade** |  |  | <0.001 |
| II | 57 (17.9%) | 114 (35.7%) |  |
| III | 88 (27.6%) | 156 (48.9%) |
| IV | 174 (54.5%) | 49 (15.4%) |
| **IDH status** |  |  | <0.001 |
| Mutant | 108 (34.3%) | 221 (80.4%) |  |
| Wild type | 207 (65.7%) | 54 (19.6%) |
| **1p/19q status** |  |  | <0.001 |
| Codeletion | 21 (7.3%) | 116 (40.6%) |  |
| Non-codeletion | 267 (92.7%) | 170 (59.4%) |
| **MGMT promoter status** |  |  | 0.592 |
| Methylated | 147(56.8%) | 146 (59.1%) |  |
| Unmethylated | 112 (43.2%) | 101 (40,9%) |

**Supplementary Table S5. The PRGPI adjusted by other clinicopathological characteristics in CGGA693, CGGA325 and TCGA cohorts**

| **Adjusted variable** | **HR (95% CI) of PRGPI** | ***p*-value** |
| --- | --- | --- |
| *CGGA693* |  |  |
| **Age** | 2.800 (2.381-3.291) | <0.001 |
| **Gender** (Male vs Female) | 2.881 (2.457-3.379) | <0.001 |
| **WHO grade** (IV, III and II) | 1.965 (1.654-2.336) | <0.001 |
| **IDH** (Mutation vs wild type) | 2.141 (1.747-2.625) | <0.001 |
| **1p19q** (Codeletion vs Non-codeletion) | 2.437 (2.038-2.916) | <0.001 |
| **MGMTp** (Methylation vs Unmethylation) | 2.679 (2.257-3.179) | <0.001 |
| *CGGA325* |  |  |
| **Age** | 2.103 (1.781-2.482) | <0.001 |
| **Gender** (Male vs Female) | 2.282 (1.944-2.678) | <0.001 |
| **WHO grade** (IV, III and II) | 1.578 (1.324-1.800) | <0.001 |
| **IDH** (Mutation vs wild type) | 2.034 (1.650-2.509) | <0.001 |
| **1p19q** (Codeletion vs Non-codeletion) | 1.869 (1.582-2.208) | <0.001 |
| **MGMTp** (Methylation vs Unmethylation) | 2.253 (1.918-2.645) | <0.001 |
| *TCGA* |  |  |
| **Age** | 1.068 (1.054-1.083) | <0.001 |
| **Gender** (Male vs Female) | 1.091 (1.076-1.106) | <0.001 |
| **WHO grade** (IV, III and II) | 1.046 (1.031-1.062) | <0.001 |
| **IDH** (Mutation vs wild type) | 1.088 (1.073-1.103) | <0.001 |
| **1p19q** (Codeletion vs Non-codeletion) | 1.091 (1.076-1.106) | <0.001 |
| **MGMTp** (Methylation vs Unmethylation) | 1.090 (1.075-1.105) | <0.001 |

**Supplementary Table S6. The output information of TIDE algorithm in CGGA693 cohort**

**Supplementary Table S7. The output information of TIDE algorithm in TCGA cohort**
